1 **Exploring Environmental Coverages of Species: A New Variable Selection Methodology for**  
2 **Rulesets from the Genetic Algorithm for Ruleset Prediction**

3 Anni Yang<sup>a, b</sup>, Juan Pablo Gomez<sup>a, b, c</sup>, Jason K. Blackburn<sup>a, b, \*</sup>

4 <sup>a</sup> Spatial Epidemiology & Ecology Research Laboratory, Department of Geography, University  
5 of Florida, Gainesville, Florida 32611, USA

6 <sup>b</sup> Emerging Pathogens Institute, University of Florida, Gainesville, Florida 32611, USA

7 <sup>c</sup> Departamento de Química y Biología, Universidad del Norte, Barranquilla, Colombia

8 \* Corresponding author: [jkblackburn@ufl.edu](mailto:jkblackburn@ufl.edu)

9 Phone: 352-278-3232

10 Fax: 352-392-8855

11

12

13

14 <sup>1</sup> Abbreviations

15

16

---

<sup>1</sup> SDMs: species distribution models  
GARP: Genetic Algorithm for Ruleset Prediction  
US: the United States  
ENMs: ecological niche models  
CART: classification and regression tree  
DG: DesktopGARP  
UI: Unimportance Index  
AUC: area under the curve  
BRTs: boosted regression trees

17 **Abstract**

18 Variable selection for, and determination of variable importance within, species distribution  
19 models (SDMs) remain an important area of research with continuing challenges. Most SDM  
20 algorithms provide normally exhaustive searches through variable space, however, selecting  
21 variables to include in models is a first challenge. The estimation of the explanatory power of  
22 variables and the selection of the most appropriate variable set within models can be a second  
23 challenge. Although some SDMs incorporate the variable selection rubric inside the algorithms,  
24 there is no integrated rubric to evaluate the variable importance in the Genetic Algorithm for  
25 Ruleset Production (GARP). Here, we designed a novel variable selection methodology based on  
26 the rulesets generated from a GARP experiment. The importance of the variables in a GARP  
27 experiment can be estimated based on the consideration of the prevalence of each environmental  
28 variable in the dominant presence rules of the best subset of models and its coverage. We tested  
29 the performance of this variable selection method based on simulated species with both weak and  
30 strong responses to simulated environmental covariates. The variable selection method generally  
31 performed well during the simulations with over 2/3 of the trials correctly identifying most  
32 covariates. We then predict the distribution of *Bacillus anthracis* (the bacterium that causes  
33 anthrax) in the continental United States (US) and apply our variable selection procedure as a  
34 real-world example. We found that the distribution of *B. anthracis* was primarily determined by  
35 organic content, soil pH, calcic vertisols, vegetation, sand fraction, elevation, and seasonality in  
36 temperature and moisture.

37 **Keywords:** GARP; variable selection; physiological mechanisms; median range; prevalence;  
38 *Bacillus anthracis*.

39

## 40 **1. Introduction**

41 Species distribution models (SDMs; i.e. ecological niche models [ENMs]) have been  
42 widely applied in ecology, biogeography, conservation biology, evolution, and epidemiology  
43 over the past several decades (Larson et al., 2010; Ostfeld et al., 2005; Pearson and Dawson,  
44 2003; Peterson and Vieglais, 2001). Modeling a species' geographic distribution relies on some  
45 form of pattern-recognition based on non-random association between the geographic  
46 occurrences of a species and environmental conditions that support its survival under the  
47 ecological niche theory (Araujo and Guisan, 2006; Hutchinson, 1957). The ecological niche of a  
48 species can be defined as the environmental conditions that allow the population to be  
49 maintained without immigration (Grinnell, 1917; Pulliam, 1988) and can be described by an n-  
50 dimensional hyper-volume of environmental covariates that determine the ecological space of  
51 the species (Hutchinson, 1957). Hence, the accuracy of predicted distributions is primarily driven  
52 by the adequacy of environmental covariates used in the models (Araujo and Guisan, 2006;  
53 Austin, 2007). Species' distributions and their environmental requirements can be veiled or  
54 misleading due to the selection of inappropriate predictors (Araujo and Guisan, 2006).  
55 Incorporating the suitable covariates in ecological niche modeling experiments remains an  
56 important area of research with continuing challenges.

57 Most SDM algorithms use exhaustive searches through variable space (in multiple  
58 combinations) in order to identify the variables that define a species' distribution. As the most  
59 biologically-based decision in SDMs, the selection of environmental covariates should primarily  
60 depend on the knowledge of the adaption of species' physiology to the ecological or biological  
61 conditions (ecophysiological or biophysiological processes) that govern the relationships  
62 between a species and the environment (Austin, 2007). However, this information is difficult to

63 obtain in many cases, especially for some poorly understood species. With a large number of  
64 potential predictors, including biotic and abiotic, direct and indirect factors, which influence  
65 species' responses to environmental gradients and available resources (Austin and Van Niel,  
66 2011), some crucial questions arise, like "how many variables are enough" and "which variables  
67 need to be included" (Araujo and Guisan, 2006; Huston, 2002). The evaluation of variable  
68 contributions within SDMs is an alternative to quantify the relationship between the species  
69 survival and environment to understand the ecological requirements of a species. The estimation  
70 of variable contribution in the SDMs provides an objective metric to infer the strength of species  
71 response to the environmental conditions, which can help to hypothesize about the  
72 ecophysiological processes determining the geographical distributions and understand some  
73 basic biology of the species (Araujo and Guisan, 2006). Finally, the variables contributing most  
74 are selected to interpret the species' ecological niche and predict the most likely distribution  
75 (species range).

76         The estimation of each variable's explanatory power and the selection of the optimal  
77 variable set within models, however, can be challenging for some species distribution modelling  
78 approaches, such as the Genetic Algorithm for Ruleset Production (GARP). GARP is a common  
79 technique for predicting species distributions based on presence-only data via an algorithm  
80 employing a superset of logistic regression, range and negated range rules, and atomic (bioclim)  
81 rules (Stockwell, 1999). GARP experiments can employ the Jackknife procedure (Levine et al.,  
82 2007; Peterson and Cohoon, 1999; Thomasson and Blouin-Demers, 2015), but there is no easy  
83 way and rubric for the estimation of variable contribution. Levine et al. (2009) presented a  
84 method for performing a statistically based comparison between the comprehensive map (i.e. N  
85 variables) and jackknifed maps (i.e. N-1 variables) generated from GARP to determine the

86 optimal ecological parameters for predicting human monkeypox disease. The larger differences  
87 found between the output from an experiment with all models and the map produced from a  
88 jackknifed experiment, the greater the contribution the reduced variable made in those  
89 experiments (Levine et al., 2009). However, this estimation relies on the prediction performance  
90 of GARP and assumes that the comprehensive map, as the base map, represents the geographic  
91 distribution predicted by the “true” fundamental niche. Also, the computational intensity for  
92 massive iterations of the jackknife procedure makes variable selection difficult when there is a  
93 large set of potential environmental covariates. Alternatively, Sweeney et al. (2007) employed an  
94 external classification and regression tree (CART) to select the optimal environmental layers to  
95 be used in GARP experiments to model the distribution of *Anopheles punctulatus* in Australia.  
96 However, GARP and CART use different algorithms to determine relationships between species’  
97 occurrences and environmental covariates. GARP includes logistic regression and range  
98 envelopes, while CART constructs decision trees by making binary splits of the covariates.  
99 These differences in algorithms may result in different estimations of variable explanatory power  
100 and therefore the variable set selected by CART may not be optimal for GARP.

101         Exploring the variable space that defines the ecological niche of a species can help us in  
102 understanding the underlying ecophysiological processes of the species’ distribution. Here, we  
103 present a novel variable selection methodology for GARP based on the exploration of the GARP  
104 rulesets to consider the explanatory power of variables within a modeling experiment and the  
105 biological information within the experiment using those variables. We base our variable  
106 selection process mainly in two metrics: 1) the prevalence of each environmental variable in the  
107 dominant presence rules of the best model subset from a GARP experiment, and 2) the variables’  
108 median range in those rules. In this study, we explain in detail the new variable selection

109 procedures and test its performance using simulations and provide a real-world case study for  
110 exploring ecological requirements and predicting the distributions of the *Bacillus anthracis* in the  
111 continental US using a bioclimatic variable set recently introduced to the modeling community.

## 112 **2. Materials and Methods**

### 113 **2.1. GARP**

114 GARP is a presence-only iterative modeling algorithm that searches for non-random  
115 relationships between point occurrence data and environmental covariates. For this study, we use  
116 DesktopGARP (DG) version 1.1.3 to perform GARP experiments. The procedure for running a  
117 GARP experiment is demonstrated in Fig. 1. Initially, we split the occurrence data into external  
118 training and testing sets. The external training set is inputted in DG for model building, while the  
119 testing set is withheld for external model accuracy tests to evaluate the performance of GARP  
120 experiment. Each properly executed GARP experiment will include multiple models and each  
121 will have a ruleset with 50 rules predicting presence or absence (note: there are GARP  
122 implementations in openModeller allowing the user to control the number of rules). There are  
123 four types of rules (range, negated range, atomic, or logit) described as the if/then logic  
124 statements. Range rules specify the envelope with upper and lower bounds for the presence of  
125 the species (e.g. IF temperature = [10.2 – 13.5°C] AND NDVI = [0.15 – 0.23] THEN species =  
126 PRESENCE). Negated range rules define the conditions outside of variable ranges (e.g. IF NOT  
127 temperature = [10.2 – 13.5°C] AND NDVI = [0.15 – 0.23] THEN species = ABSENCE). Logit  
128 rules employ logistic regression to determine the relationship between the species occurrence and  
129 covariates (e.g. IF temperature\*0.0037 + NDVI\*0.57 THEN species = PRESENCE). The  
130 presence or absence of the species in the logit rule type is determined based on the probability of  
131 the occurrence of the species predicted by the logistic regression with the threshold of 0.5.

132 Atomic rules use specific values of the covariates to determine the presence of the species (e.g.  
133 IF temperature = 12.5°C AND NDVI = 0.19 THEN species = PRESENCE). Those rules are  
134 developed and tested internally using random draws of presence points from the known  
135 occurrences and random draws of the background space representing absences (i.e. pseudo-  
136 absences). An internal chi-square test built on the predicted and observed values is used to  
137 evaluate the quality of each rule at predicting presence or absence with the user's pre-defined  
138 proportion of input data (internal testing set). GARP can accept, modify or delete rules using  
139 deletions, insertions, cross-overs, among other types of mutations to improve predictive accuracy  
140 in a genetic fashion.

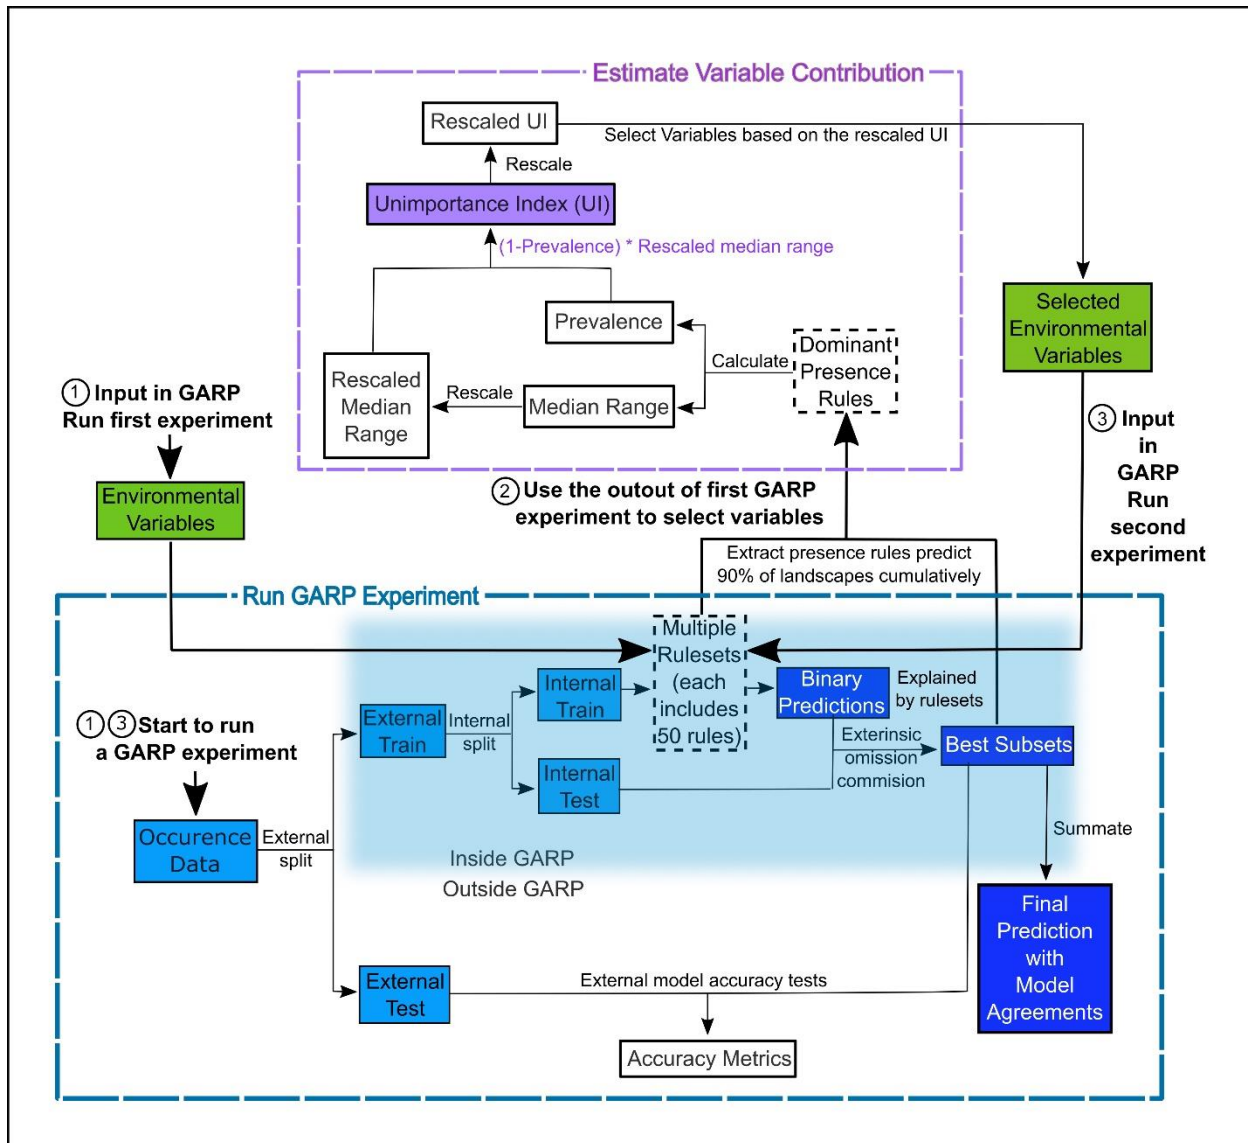

141

142 **Fig. 1.** Flowchart depicting the procedure to run a GARP experiment and estimate variable  
 143 contribution. There are three steps for predicting species distribution and selecting variables  
 144 selected via Unimportance Index (UI). First, run a complete GARP experiment with the full  
 145 variable set. Second, use the output of the first GARP experiment to rank and select variables  
 146 based on UI. Third, input the important variables in GARP to run the second GARP experiment  
 147 to predict the species distributions.

148



149           Once a ruleset is developed, it is projected onto the geography of the study area to  
150   develop a presence/absence map describing the species' potential geographic distribution, e.g.  
151   Blackburn (2006), Joyner (2010), and Stockwell (1999). Given the iterative nature of GARP, the  
152   model does not arrive at a single solution. DG splits input occurrence data into training and  
153   testing sets inside the software for model evaluation and incorporates a "best subset" procedure,  
154   which would select the best subset of models based on two criteria: omission (false negative) and  
155   commission (false positive; percent of pixels predicted present) rates. Such calculations are  
156   performed on each individual model and the "best subset" procedure selects a user defined  
157   number of models based on specific omission and commission values. Here, experiments were  
158   setup to run up to 200 models, we selected 20 models with no more than 10% "extrinsic"  
159   omission rate, which is calculated from the internal testing set. A median commission percentage  
160   is then calculated for the 20 low-omission models. Investigators can define the percentage  
161   (defaulted to 50%; 10 models) of the low-omission models that have individual commission  
162   closest to the median to be selected as the best subset (McNyset and Blackburn, 2006). Finally,  
163   the best subset with 10 best presence-absence predictions can be summed and mapped on the  
164   landscape with model agreements indicating the likelihood of the species presences. GARP has  
165   been shown to perform well across the spectrum of species' prevalence on the landscape from  
166   rare to common making it useful for management oriented studies focused on relating  
167   geographic potential to management or conservation needs (Peterson et al., 2007). A more  
168   extensive description of GARP's modeling framework and test of its performance can be found  
169   elsewhere (Anderson et al., 2003; Martinez-Meyer et al., 2006; Peterson and Cohoon, 1999;  
170   Stockwell, 1999), and in this study, we limit our objectives to describe the variable selection  
171   procedure.

## 172 2.2. Conceptual Framework for variable selection procedures

173 We designed a new variable selection methodology to estimate variable contributions to  
174 species distributions in GARP. We used accuracy metrics (omission and commission rates and  
175 area under the curve (AUC)) to select the best subset of models (rulesets) in the GARP  
176 experiment. We measured the variable contributions based on two criteria: 1) the prevalence of  
177 the variable in the dominant presence rules and 2) the scaled median range for those variables  
178 across the rules within the best subset of the GARP experiment.

179 The prevalence of a variable in the dominant presence rules of the best subset is defined  
180 as the frequency with which the variable predicts the presence of the species in the dominant  
181 presence rules of the best subset (See Equ. 1). With the best subset process activated, DG selects  
182 a set of best models as described above. The dominant presence rules in the best subset are  
183 defined as a subset of rules that cumulatively predict the over 90% of the species' presence on  
184 the landscape in the top-selected 10-model subset (Mullins et al., 2011). Those rules represent  
185 the primary suitable environmental conditions that define the core of the ecological niche of the  
186 species (based on the set of variables available) but does not take into account rare situations in  
187 which species are occasionally or temporarily present. Here we only analyzed presence rules,  
188 since absence rules tend to have wide median ranges. We defined prevalence as:

189  $Prevalence_{(best\ subset)} =$

$$190 \frac{\text{the number of times the variable is present in the dominant presence rules}}{\text{total number of dominant presence rules}} \quad \text{Equ.1}$$

191 The high prevalence rate of a variable indicates that the variable is frequently used to predict the  
192 presence of the species in the best subset. Thus, a variable with a higher prevalence rate suggests  
193 the variable is relatively more important in the GARP experiment.

194           The median range of a variable is defined as the difference between the median values  
195 from a set of maximum and minimum values of this variable in the dominant presence rules from  
196 the best subset (Joyner, 2010). For different types of rules, the maximum and minimum values  
197 are extracted in different ways. In range and negated range rules, the maximum and minimum  
198 values are extracted directly from the upper and lower boundaries recorded in the rulesets. For  
199 the logit rules, the maximum and minimum values are extracted from the landscape where those  
200 logit rules are used to predict the presence of the species via zonal statistics. For atomic rules, the  
201 specific values of the covariates that predict the presence of the species are directly extracted  
202 from the rules. We then compare the extracted value of the atomic rules with the maximum and  
203 minimum values from other types of rules to evaluate whether it fell inside the coverage. To  
204 quantitatively compare the median ranges of different variables, we scale the median range of  
205 each variable from 0 to 1 (Barro et al., 2016). A variable with a wide median range indicates that  
206 the presence of species is not sensitive to this predictor, while a variable with a narrow median  
207 range suggests that the occurrence of the species is constrained to specific conditions regarding  
208 the covariate (Barro et al., 2016; Mullins et al., 2011).

209           We measured the variable contribution to GARP based on an Unimportance Index (UI) to  
210 consider both criteria, the prevalence rate and scaled median range. The UI of each covariate is  
211 calculated as the multiplication of the scaled median range and the probability that the variable is  
212 not used to predict the presence of the species in the dominant presence rules of the best subset  
213 (Equ. 2). This multiplication would help to combine and balance both criteria. Variables with  
214 less contribution to a GARP experiment are defined as the ones with wider median range and  
215 lower prevalence. Therefore, the larger the UI value is, the less contribution the associated

216 variable brings to the model. To clearly compare and evaluate variable contribution we finally  
217 rescaled the UI to 0-1 following Equ. 3:

$$218 \quad UI = (1 - prevalence) * median\ range \quad \text{Equ. 2}$$

$$219 \quad rescaled\ UI_k = \frac{UI_k - UI_{min}}{UI_{max} - UI_{min}} \quad \text{Equ. 3}$$

220 where  $UI_k$  is the unimportance index for covariate  $k$ ;  $UI_{max}$  and  $UI_{min}$  are the maximum and  
221 minimum value of the UIs for the covariates in the variable set, respectively. This procedure of  
222 the estimation of variable contributions are shown in Fig. 1 and programmed in “GARPTools”  
223 R-package (available at <https://github.com/cghaase/GARPTools>).

224 2.3. Testing the performance of the new variable selection procedure using simulations

225 2.3.1. Simulating the species and sampling it

226 To test the performance of the aforementioned variable selection method we first  
227 generated ten normally distributed environmental covariates with spatial autocorrelation on a  
228  $10.5 * 10.5$  degree landscape at a 0.01 degree resolution (Fig. A. 1). Five of those covariates  
229 were simulated using an exponential variogram model with a range of 10, sill of 1, and nugget of  
230 0, the others used a spherical variogram model with a range of 6, sill of 1, and nugget of 0. Next,  
231 we simulated 200 species using three variables from the entire set drawn at random without  
232 replacement. The probability of occurrence was computed as:

$$233 \quad P(\text{probability of occurrence}) = e^{-((\beta_1 * x_1 + \beta_2 * x_2 + \beta_3 * x_3)^2)} \quad \text{Equ. 4}$$

234 where  $\beta_1$ ,  $\beta_2$ , and  $\beta_3$  are the coefficient that determines the influence of each covariate on the  
235 species distribution and  $x_1$ ,  $x_2$ , and  $x_3$  are the environmental covariates. The three selected  
236 variables used in species distribution simulation were recorded for further validation of the  
237 performance of the variable selection procedures. Once we obtained the probability surface on  
238 the landscape, we used it as the success probability of a Bernoulli random trial to obtain the true

239 distribution (Elith and Leathwick, 2009). The three coefficients for each species were sampled  
240 from a normal distribution under two scenarios. The first represents a scenario in which the  
241 environmental covariates weakly define the species distribution. In this case, we sampled the  
242 coefficients from a normal distribution with mean of one and standard deviation of 0.5. For the  
243 second scenario we assumed that the coefficients had a stronger effect on the distribution of the  
244 species such that the coefficients were normally distributed with mean of five and a standard  
245 deviation of 0.5. We simulated 100 species using the weak effect coefficients and 100 using the  
246 strong effect. Finally, we randomly extracted 50 presence locations from the centroid of the grid  
247 cells of the realized distribution for each species as the presence-only data to input in GARP.

### 248 2.3.2. Testing the variable selection performance

249 To test the performance of the UI, we used the full set of ten environmental variables and  
250 the 50 presence points sampled from the species distribution to generate a GARP experiment for  
251 each species. Here, since the true distributions of the simulated species is known, we can directly  
252 compare the predictions with true distributions without withholding part of data for external  
253 model validation. We set the training/testing data split to 75%/25% inside DG. To maximize  
254 GARP performance, model runs were set to a maximum of 1,000 iterations or until convergence  
255 of 0.01. The best subset procedure selected ten best models under a 10% extrinsic omission  
256 threshold and a 50% commission threshold (Fielding and Bell, 1997). Those 10-model best  
257 subsets were added together using GARPTools R-package.

258 For each of the 200 species we calculated the UI for all the ten variables used in model  
259 development and recorded the three variables with the lowest UI (i.e. the three variables with  
260 highest contribution to the predicted distributions). We evaluated the performance of the model  
261 and the UI by counting the number of variables  $r$  ( $r = 0,1,2,3$ ) correctly identified by the model

262 for each of the species. Next we counted the number of species  $s$  ( $s = 0, 1, 2, \dots, S$ ) with  $r = 0, 1,$   
263 2, and 3. Finally, we compared the distribution of  $s$  to the distribution generated by drawing three  
264 variables at random out of the ten used to generate each SDM. The probability of  $r = 0, 1, 2, 3$  is  
265 given by

$$266 \quad P(R = r) \begin{cases} 0.29 & \text{if } R = 0 \\ 0.53 & \text{if } R = 1 \\ 0.175 & \text{if } R = 2 \\ 0.008 & \text{if } R = 3 \end{cases} \quad \text{Equ. 5}$$

267 We then used a one tailed Pearson's chi-squared statistic to compare the expected and  
268 observed number of cases with zero, one, two, and three variables being correctly identified for  
269 all the 200 simulated species and for each weak and strong effect scenario separately (see  
270 Appendix B for proof of how probabilities were derived).

#### 271 2.4. Case study: modeling *Bacillus anthracis* in the continental US

272 Applications of SDMs to pathogens or disease systems remain an important tool for  
273 estimating disease distributions or mapping risk areas. Understanding variable contribution can  
274 assist on evaluating biological information within models and how those compare to real-world  
275 knowledge of pathogen or host/vector biology. To explicitly demonstrate the use of the new  
276 variable selection procedure, we provide a real-world case study for exploring the ecological  
277 requirements and distributions of the *B. anthracis* in the continental US.

278 Anthrax, a zoonotic disease, primarily affects wildlife and livestock and secondarily  
279 afflicts humans nearly worldwide (Alexander et al., 2012). *Bacillus anthracis*, the causative agent  
280 of anthrax, is a spore-forming bacterium, which is endemic to specific soil environments and can  
281 persist for extended periods of time (years to decades) (Van Ness, 1971). Several ecological  
282 niche modeling studies have defined the ecological niche as a narrow range of moderate NDVI  
283 (indicative of grasslands) with limited annual precipitation and high soil pH (Barro et al., 2016;

284 Blackburn et al., 2007; Joyner, 2010; Mullins et al., 2011). Anthrax is an established disease in  
285 the US (Stein, 1945) and still remains endemic in some parts of the country, such as the recent  
286 outbreaks in Montana in 2008 and 2010 (Blackburn et al., 2014a; Morris et al., 2016) and the  
287 enzootic zone of West Texas (Blackburn et al., 2014b).

#### 288 2.4.1. Data

289 We adopted the historical anthrax outbreak data (305 cases) from Blackburn et al. (2007).  
290 The outbreaks in eastern Oklahoma were excluded from this study, since the environmental  
291 conditions in that region are not suitable for the survival of *B. anthracis* spores, and those  
292 occurrence of the outbreaks and temporary suitable environment were suggested to result from  
293 anthropogenic activities (Blackburn et al., 2007; Van Ness, 1959). We used 26 climatic and  
294 biophysical covariates as the environmental coverages for modelling distribution of *B. anthracis*.  
295 The details of data and sources are shown in Table 1. All environmental layers were resampled  
296 to 2.5 arcminute resolution. Given the resolution of the environmental layers, the 305 anthrax  
297 outbreak cases represented 175 unique pixel cells which were selected using the spatially unique  
298 routine in GARPTools.

299 **Table 1.** Environmental variables used for *B. anthracis* GARP experiment.

| Environmental Layer (unit)                         | Names    | Resolution    | Source                 |
|----------------------------------------------------|----------|---------------|------------------------|
| Elevation (meter)                                  | Alt      | 1 km          | WorldClim <sup>a</sup> |
| Bioclimatic data (°C or kg of water/<br>kg of air) | Bio 1-19 | 2.5 arcminute | MERRAclim <sup>b</sup> |
| Mean NDVI (no unit)                                | wd0114a0 | 1 km          | TALA <sup>c</sup>      |
| NDVI annual amplitude (no unit)                    | wd0114a1 | 1 km          | TALA                   |
| Top soil pH (no unit)                              | pH       | 1 km          | SoilGrids <sup>d</sup> |

|                                      |                  |      |           |
|--------------------------------------|------------------|------|-----------|
| Sand fraction in top soil (% weight) | sand fraction    | 1 km | SoilGrids |
| Calcium Vertisols (% weight)         | calcium vertisol | 1 km | SoilGrids |
| Top soil organic content (g per kg)  | organic content  | 1 km | SoilGrids |

---

300 *Note: a) the WorldClim elevation data were accessed from [worldclim.org/](http://worldclim.org/) (Hijmans et al.,*  
301 *2005); b) the MERRAclim dataset from the 2000s decade with the mean humidity version was*  
302 *downloaded from <https://datadryad.org/> (Vega et al., 2016; 2017); c) NDVI measurements were*  
303 *accessed from the Trypanosomiasis and Land Use in Africa (TALA) research group (Oxford,*  
304 *United Kingdom; Hay et al., 2006); d) Four soil layers were obtained from SoilGrids website*  
305 *(<https://soilgrids.org/>). All the data were accessed on Sep 21, 2018.*

#### 306 2.4.2. Variable selection based on UI to predict *Bacillus anthracis*

307 To explore the environmental coverages for *B. anthracis*, we followed a similar  
308 procedure as for the simulated species. We first input all 26 environmental covariates in GARP.  
309 Since the true distribution of the species is unknown, and to validate the predicted distributions  
310 from GARP, we split the 175 spatially unique anthrax occurrence data into external  
311 training/testing set with 75%/25% ratio prior to model construction (Fig. 1). We built the GARP  
312 model following the parameterization in Blackburn et al. (2007). In a first GARP experiment, we  
313 calculated the UI for each of the 26 variables and assumed them to be important if the UI value  
314 was smaller than 0.5. Finally, we re-ran the GARP experiment using only the variables identified  
315 to be important.

316 Predictive accuracy for the best subsets from the GARP experiment with the UI-based  
317 reduced variable set was evaluated using a combination of AUC, omission, and commission rates  
318 based on the external testing dataset (Lim and Klein, 2006; Peterson et al., 2007). The AUC,  
319 although not an ideal metric for accuracy estimation (Lobo et al., 2008), is useful to identify



320 models that perform well (Hanley and McNeil, 1982; Mullins et al., 2013; Sloyer et al., 2018).

321 The 10-model best subset from the UI-based experiment was summated to map the potential  
322 geographic distribution of *B. anthracis* for the continental US.

### 323 **3. Results**

#### 324 3.1. Simulated species and variable selection performance in simulation scenarios

325 Examples for the probability maps of species distributions, binary occurrence maps  
326 simulated with weak and strong correlations, and GARP predictions based on those simulated  
327 species are illustrated in Fig. 2. We found that UI and GARP performed well during the  
328 simulations. For the 200 simulated species we found that the observed number of species with  $r$   
329 = 0, 1, 2, 3 does not follow the distribution of random draws ( $\chi^2 = 724.3$ ,  $n = 200$ ,  $df = 3$ ,  $p <$   
330  $0.0001$ ) and in particular the observed number of species with  $r = 2$  and  $r = 3$  is significantly  
331 higher than expected by chance (Table 2). We found a similar result when analyzing separately  
332 the species in which environmental covariates were assumed to have a weak and strong effect on  
333 the geographic distribution (Table 2; weak:  $\chi^2 = 367.2$ ,  $n = 100$ ,  $df = 3$ ,  $p < 0.0001$ ; strong:  $\chi^2 =$   
334  $360.1$ ,  $n = 100$ ,  $df = 3$ ,  $p < 0.0001$ ). Finally, we found no differences in the observed number of  
335 species with  $r = 0, 1, 2, 3$ , when comparing the species simulated using strong and weak  
336 coefficients ( $\chi^2 = 2.64$ ,  $df = 3$ ,  $p = 0.45$ ).

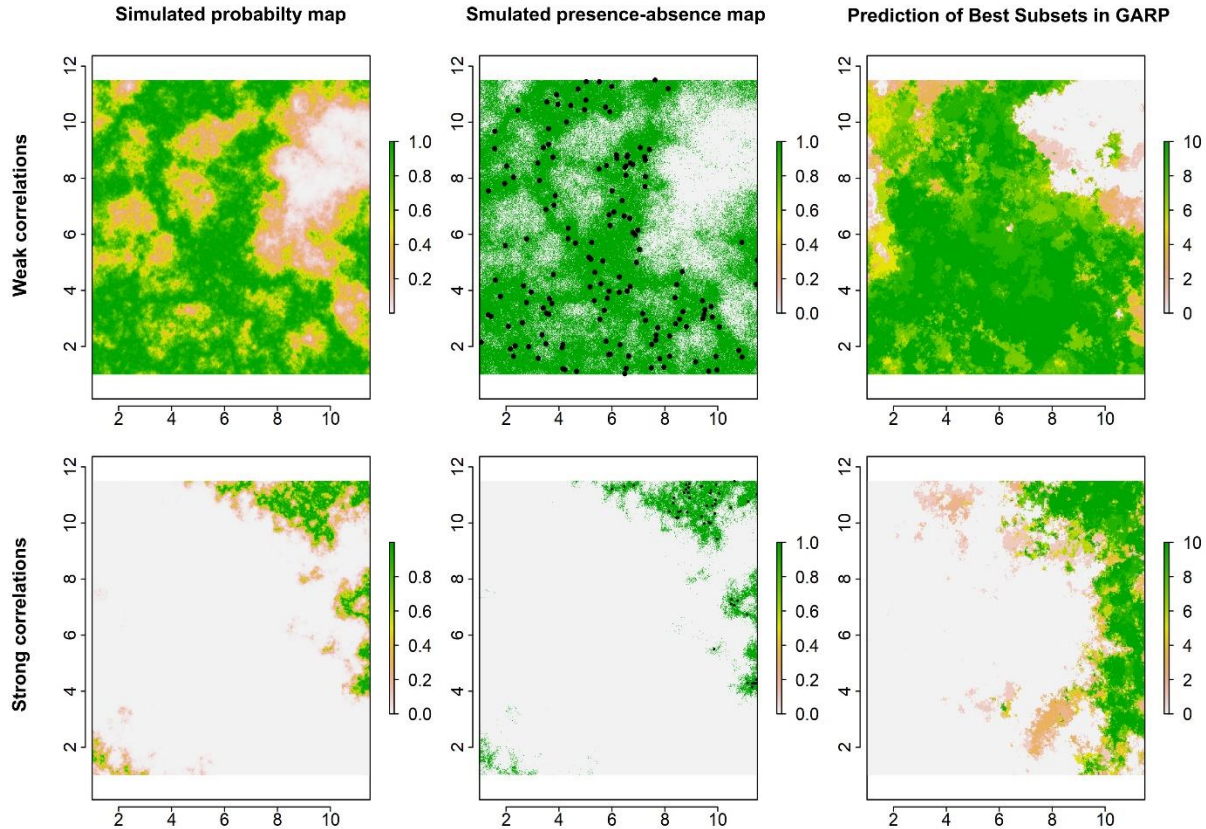

337

338 **Fig. 2.** Simulated species distributions, occurrence (presence-absence) maps, and GARP  
339 prediction map for the best subset under the two scenarios where the correlation between species  
340 occurrence and environment are weak and strong; the black points are the presence locations  
341 extracted from occurrence map for modelling species distributions in GARP.

342 **Table 2.** Summary of the observed and expected number of species for which the variable  
343 selection method correctly identified zero, one, two or three out of three variables used to  
344 simulate the species distribution. The counts are tallied for 200 simulated species (All) and  
345 separated by the 100 species for which we selected Weak and Strong influence of the  
346 environmental variables on determining the species distribution.

| Scenarios | 0        |          | 1        |          | 2        |          | 3        |          |
|-----------|----------|----------|----------|----------|----------|----------|----------|----------|
|           | Observed | Expected | Observed | Expected | Observed | Expected | Observed | Expected |
| Weak      | 4        | 29       | 24       | 53       | 57       | 17       | 15       | 1        |
| Strong    | 9        | 29       | 26       | 53       | 49       | 17       | 16       | 1        |
| All       | 13       | 58       | 50       | 105      | 106      | 35       | 31       | 2        |

347

### 348 3.2. Ecological requirements and distributions of *B. anthracis*

349 We selected 12 variables with UI less than 0.5, including the climatic (temperature and  
 350 moisture) seasonality, elevation, mean NDVI, seasonality of NDVI, organic contents, calcic  
 351 vertisols, pH, and sand fractions (Table 3). AUC value of the GARP experiment with the reduced  
 352 variable set was 0.86 (Table 4). The total and average omission rates of this best subset were  
 353 0.02% and 5.11%, respectively, and the total and average commission rates were 21.55% and  
 354 10.14%, respectively (Table 4).

355 **Table 3.** Estimation of variable contribution for the *B. anthracis* in GARP experiment.

| Names                 | Prevalence | Medium Range | Rescaled<br>Unimportance Index |
|-----------------------|------------|--------------|--------------------------------|
| Organic Contents      | 0.81       | 0.24         | 0                              |
| Bio 2                 | 0.84       | 0.33         | 0.02                           |
| Altitude              | 0.81       | 0.33         | 0.05                           |
| Soil pH               | 0.81       | 0.34         | 0.05                           |
| NDVI Annual Amplitude | 0.88       | 0.51         | 0.05                           |
| Mean NDVI             | 0.69       | 0.37         | 0.19                           |
| Calcic Vertisols      | 0.56       | 0.27         | 0.21                           |

|               |      |      |      |
|---------------|------|------|------|
| Sand Fraction | 0.72 | 0.49 | 0.26 |
| Bio 5         | 0.63 | 0.47 | 0.36 |
| Bio 1         | 0.69 | 0.63 | 0.42 |
| Bio 8         | 0.66 | 0.59 | 0.44 |
| Bio 15        | 0.72 | 0.75 | 0.46 |
| Bio 3         | 0.66 | 0.67 | 0.51 |
| Bio 7         | 0.59 | 0.57 | 0.51 |
| Bio 12        | 0.66 | 0.71 | 0.56 |
| Bio 10        | 0.56 | 0.6  | 0.6  |
| Bio 19        | 0.63 | 0.79 | 0.7  |
| Bio 14        | 0.66 | 0.87 | 0.71 |
| Bio 13        | 0.59 | 0.74 | 0.71 |
| Bio 6         | 0.53 | 0.68 | 0.75 |
| Bio 4         | 0.53 | 0.68 | 0.76 |
| Bio 9         | 0.59 | 0.79 | 0.77 |
| Bio 11        | 0.59 | 0.79 | 0.77 |
| Bio 18        | 0.5  | 0.7  | 0.85 |
| Bio 17        | 0.56 | 0.83 | 0.88 |
| Bio 16        | 0.44 | 0.72 | 1    |

356

357 **Table 4.** Accuracy metrics for the *B. anthracis* GARP species distribution model.

| Metric                                  | Model Specifications |
|-----------------------------------------|----------------------|
| Num. of points in external training set | 132                  |

|                                        |        |
|----------------------------------------|--------|
| Num. of points in external testing set | 43     |
| Total omission                         | 0.02%  |
| Average omission                       | 5.11%  |
| Total commission                       | 21.55% |
| Average commission                     | 10.14% |
| AUC                                    | 0.86   |

---

358

359       The GARP experiment with the reduced variable set predicted presence of *B. anthracis*  
360 primarily along a north-south corridor starting from the Dakotas, eastern Montana, and western  
361 Minnesota southward through western Wyoming, western Nebraska, eastern Colorado, western  
362 Kansas, eastern Oklahoma, and into the New Mexico and western Texas (Fig. 3). The north-  
363 south corridor also expands westward into western Washington and Oregon through southern  
364 Idaho. The distribution was predicted in some patches of Nevada, Utah, Arizona, and  
365 southwestern California. There were also some small areas along the shorelines of the Great  
366 Lakes in eastern Wisconsin, eastern Michigan, and northwestern Ohio and northeastern Indiana.  
367 Fig. 4 illustrates the scaled median ranges and coverages of variables in the dominant presence  
368 rules of the best subset in GARP model with the reduced variable set. The variable with the  
369 narrowest range was organic content, while Bio 15 had the widest range. Calcic vertisols (0 –  
370 7.23%), altitude (134.8 – 1321.95 m), mean NDVI (-0.1 – 0.46) and soil pH (6.52 – 8.19) also  
371 had relatively small median ranges.

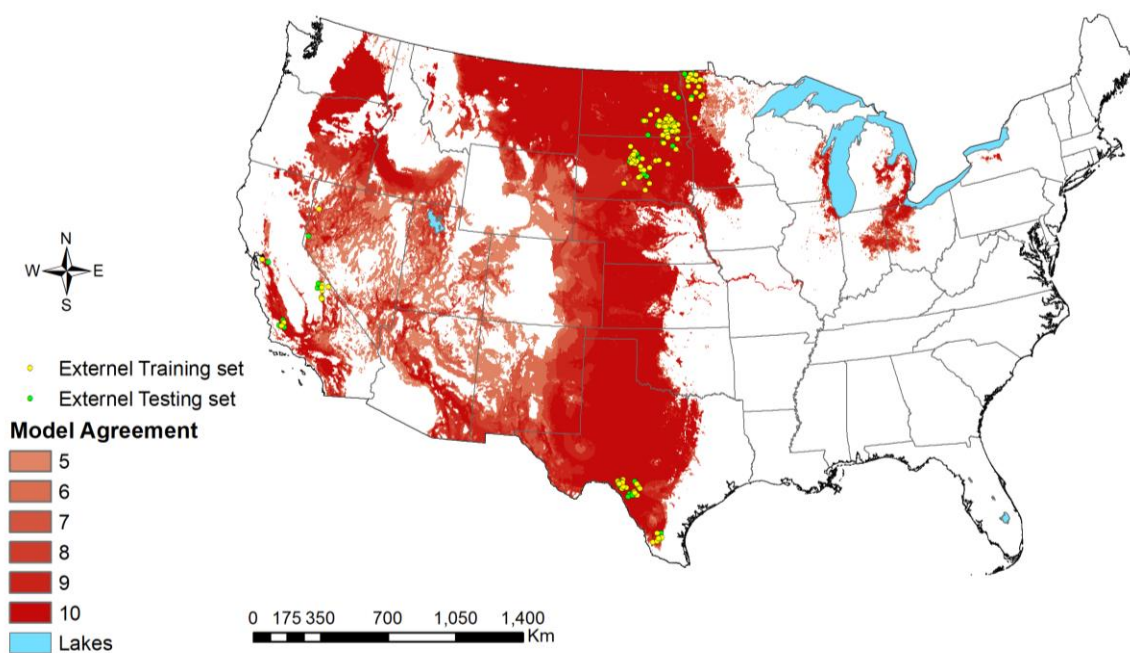

372

373 **Fig. 3.** Prediction of *B. anthracis* in the continental US from the best subset in the GARP

374 experiment using the selected variable set.

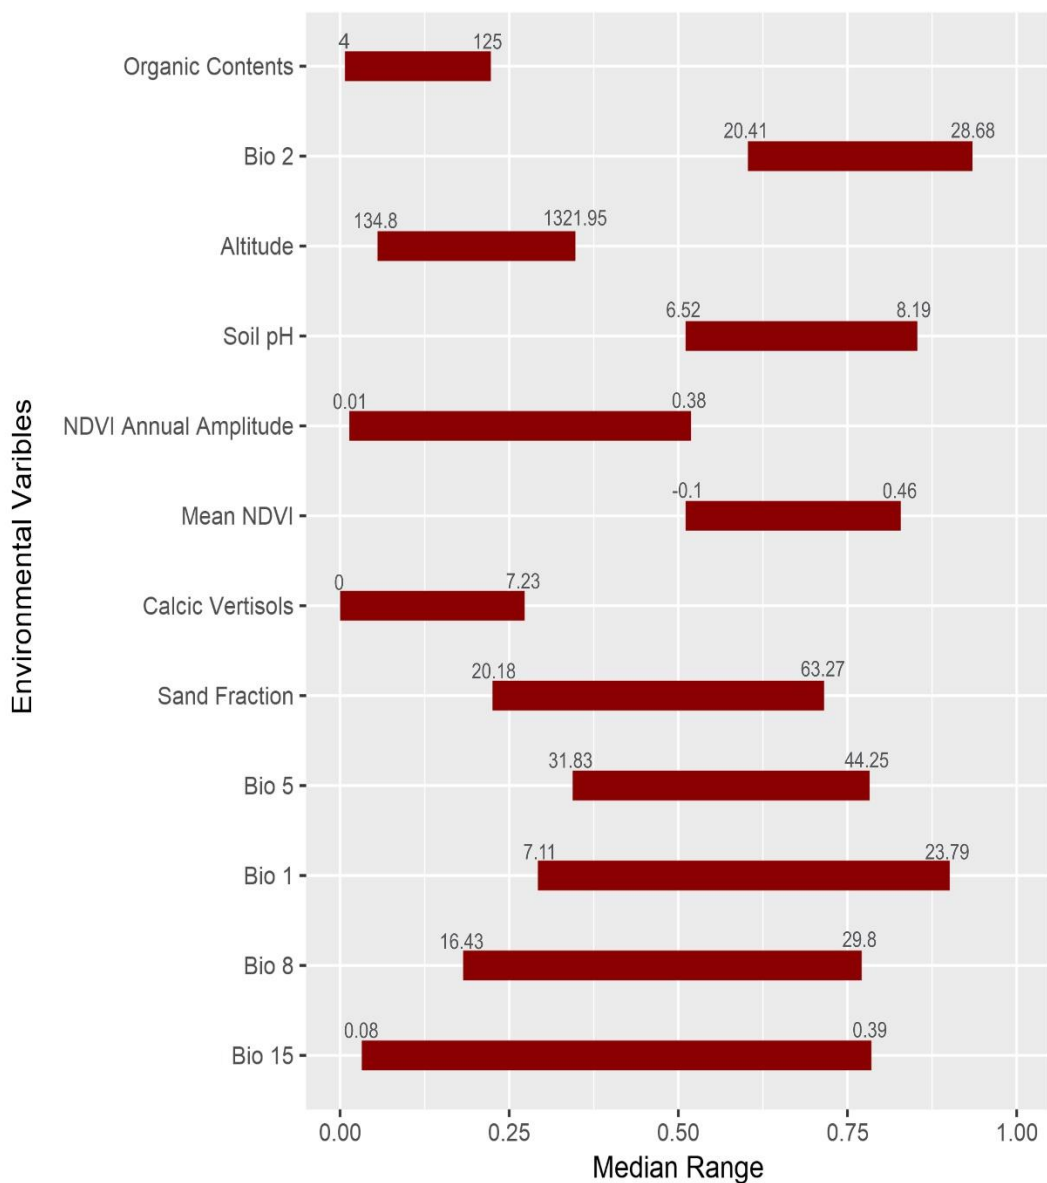

375

376 **Fig. 4.** Scaled median range of the covariates from the best subset in the GARP experiment using  
377 the selected variable set; The numbers at both sides of the bar represent the real value of the  
378 upper and lower bound of coverage.

#### 379 **4. Discussion**

380 In this study, we present a new variable selection rubric for GARP based on prevalence  
381 rates and median ranges of the variables in the dominant presence rules in best subsets. Overall,  
382 the variable selection methodology performed well by identifying the important ecological

383 variables defining the distribution of the simulated species. We found a high probability of  
384 identifying all or most of the variables that are important to the distributions of those species,  
385 irrespective of the relative influence of the variables on determining the distribution. In over 65%  
386 of the cases, our UI correctly identified at least two of the three variables defining the species  
387 environmental envelope. In the real-world case study, we identified that 12 of 26 were of high  
388 importance in determining the distribution of the *B. anthracis* in the US. The important variables  
389 included temperature and moisture seasonality, some soil conditions, and vegetation index.

390 Our new methodology for estimating variable contribution in GARP was developed  
391 considering the explanatory power within a modeling experiment measured by the frequencies  
392 the variables are used and the biological information within the experiment using those variables.  
393 The explanatory power of the variables here were first measured by the number of times that the  
394 variables were selected to predict the presence of the species in the best subsets. This idea  
395 follows from the estimation of variable contributions in some machine learning algorithms, such  
396 as Boosted Regression Trees (BRTs) and random forests, which calculate the variable  
397 contributions based on the number of times the variable is used to split the trees (Friedman and  
398 Meulman, 2003). Additionally, the biological information within the GARP experiment was  
399 quantified by the median ranges of the variables. Variables with a narrow range of values that  
400 will predict the presence of the species suggest species distributions are sensitive to those  
401 conditions (Mullins et al., 2011). Those variables might have a higher explanatory power as they  
402 may restrict the species distribution in both ecological and geographical space. If a species has a  
403 wide tolerance to a specific variable, then this variable may necessarily have low explanatory  
404 power at least in the geographic area considered. Variables that are identified with less  
405 contributions to the model could also be important conditions for the species survival but allow a



406 species to be widespread or are not the common requirement across the population of  
407 occurrences. UI considering both the frequency the variable used to predict species presence and  
408 biological information would help identify common conditions confining a species' distribution,  
409 which could be used to infer the underlying biological mechanisms of species survival.

410         We tested the performance of the proposed variable contribution estimation method in  
411 simulated species with both weak and strong correlations between species occurrence and  
412 environmental covariates and found overall good performance. Our generation of the simulated  
413 species, although is simpler than reality, follows an ecologically realistic scenario in which  
414 species distributions are a function of multiple factors and respond to the environment under a  
415 bell curve determined by these covariates and is not limited to one type of species (Elith and  
416 Leathwick, 2009). The test of the performance of UI in different simulation scenarios evaluates  
417 its general ability of correctly identifying the primary covariates that contribute to species  
418 distributions. We found that majority of the cases in both simulation scenarios selected most (2/3  
419 or all three) variables correctly, which indicates that our variable selection method performs well  
420 regardless of the strength of the environment in determining the species distribution. Overall, the  
421 good performance of UI indicates that this method allows the identification of the environmental  
422 variables that are important in defining a species distribution, and thus can allow us to make  
423 inferences about the physiological tolerances of the species and the dispersal abilities across a  
424 landscape.

425         The incorporation of the optimal variables in the model is important for making  
426 inferences about the ecology and the mechanisms determining species distributions. Including  
427 the optimal set of variables in the SDMs could increase the model accuracy and provide a better  
428 understanding of the ecological requirements for species survival. Also, filtering the most useful

429 variables among a series of candidate variables might help to reduce noise in the predictions. In  
430 the real-world case study, we selected organic contents, calcic vertisols, sand fraction, soil pH,  
431 vegetation trend and amplitude, elevation, and trend and seasonality of temperature and  
432 moisture, to describe the ecological niche of *B. anthracis*. This selection is in line with the  
433 optimal environmental variables of the survival of *B. anthracis*, including the trend of climate,  
434 elevation, vegetation indexes, soil moisture, and pH, summarized by Hugh-Jones and Blackburn  
435 (2009). The high AUC (0.86) of GARP outputs for *B. anthracis* indicated a good performance of  
436 the model with the selected optimal variable set. Additionally, the ecological requirements of *B.*  
437 *anthracis* survival identified in this study support the results reported by alternative research  
438 (Blackburn et al., 2007; Hugh-Jones and Blackburn, 2009; Hugh-Jones and De Vos, 2002; Van  
439 Ness, 1971). Anthrax is known as a hot season disease (Blackburn and Goodin, 2013) and our  
440 results suggest that the spores of *B. anthracis* were found in the places with annual mean  
441 temperature ranging from 7.11 – 23.79 °C, mean diurnal ranges varying 20.41 – 28.68 °C, and  
442 the maximum temperature in the warmest quarter from 31.83 – 44.25 °C. The UI selected all  
443 soils variables and vegetation index and suggested that *B. anthracis* was predicted to be found in  
444 areas with high soil pH (6.52-8.19), low calcic vertisols (0 – 7.23%), sand fraction of 20.18 –  
445 63.27%, organic contents ranging between 4 – 125 g/kg soil, mean vegetation index from -0.1 –  
446 0.46, vegetation annual amplitude ranging from 0.01 – 0.38. In line with our results, high  
447 concentrations of spores have been found in black steppe soils with alkaline pH (e.g. over 6.0  
448 recorded in Van Ness (1971); 5.5 – 7 in Kracalik et al. (2017) in Ghana), moderate in organic  
449 matter and calcium content (Hugh-Jones and Blackburn, 2009). The optimal vegetation  
450 greenness for anthrax occurrence is suggested as a narrow range of moderate NDVI

451 (approximately 0.2 to 0.5; indicative of grasslands), e.g. 0.1 – 0.3 in Kracalik et al. (2017), 0.17 –  
452 0.56 in Blackburn (2006).

462 The distribution of *B. anthracis* predicted here with the reduced variable set was similar  
463 to the predictions in Blackburn et al. (2007), except that the southern part of the corridor in this  
464 study was slightly more widespread than the previous results. Also, more areas around the Great  
465 Lakes region were predicted to be highly preferred by *B. anthracis* in our model. Those  
466 differences in the predictions might result from the different variable set and data sources used in  
467 the SDMs. Blackburn et al. (2007) used annual trend of climatic data (i.e. mean annual  
468 temperature and precipitation from the Bioclim dataset; (Hijmans et al., 2005)), elevation, mean  
469 NDVI, and soil moisture, and pH to develop the model, while this study included the seasonality  
470 in temperature and moisture from MERRAclim dataset (Vega et al., 2017), elevation, mean  
471 NDVI, seasonality of NDVI, organic contents, pH, calcic vertisols, and sand fractions based on  
472 our estimation of variable contributions. Additionally, different spatial scales can also influence  
473 the predictions. Given the modifiable areal unit problem in quantitative ecological studies  
474 (Openshaw and Taylor 1979), the values of pixels could vary with the changes of the pixel sizes.  
475 While Blackburn et al. (2007) predicted the distribution with  $\sim 8 * 8 \text{ km}^2$  spatial resolution, we  
476 used a  $\sim 4.5 * 4.5 \text{ km}^2$  pixel size. Despite these differences, the accuracy metrics were high and  
477 the prediction plausible.

## 478 **5. Conclusions**

479 The method described herein presents a procedure of evaluating variable contributions  
480 based on median range and the frequency the variable used to predict the presence of the species.  
481 This variable contribution estimation procedure was employed using GARP system, but the idea  
482 of the consideration of both the explanatory power and environmental coverage when selecting

483 variable is highlighted and is applicable to other SDMs. The new variable selection method was  
484 tested via simulations which we found to be accurate in the identification of the important  
485 environmental variables in determining the distribution of simulated species. We employed this  
486 method to understand the ecological requirements and geographic distributions of *B. anthracis*.  
487 The optimal ecological coverages selected by the variable selection method include the  
488 seasonality of temperature and moisture, elevation, mean and seasonality of NDVI, organic  
489 contents, calcic vertisols, pH, and sand fractions. The predicted distributions were primarily  
490 restricted to central and western US. The variable selection idea presented here provides an  
491 objective way to identify the variables that are most important for predicting species distributions  
492 with GARP, which is analogous to the variable selection methods integrated in other SDM  
493 algorithms (e.g. Maxent or BRTs) and fills the gap in the practical application in the estimation  
494 of variable contributions and variable selections in GARP.

#### 495 **Acknowledgements**

496 This study was partially supported by the National Institutes of Health [grant number  
497 1R01GM117617-01] to JKB.

498 **References**

- 499 Alexander, K.A., Lewis, B.L., Marathe, M., Eubank, S., Blackburn, J.K., 2012. Modeling of  
500 wildlife-associated zoonoses: applications and caveats. *Vector-Borne Zoonotic Dis.* 12,  
501 1005–1018.
- 502 Anderson, R.P., Lew, D., Peterson, A.T., 2003. Evaluating predictive models of species'  
503 distributions: criteria for selecting optimal models. *Ecol. Model.* 162, 211–232.
- 504 Araujo, M.B., Guisan, A., 2006. Five (or so) challenges for species distribution modelling. *J.*  
505 *Biogeogr.* 33, 1677–1688.
- 506 Austin, M., 2007. Species distribution models and ecological theory: a critical assessment and  
507 some possible new approaches. *Ecol. Model.* 200, 1–19.
- 508 Austin, M.P., Van Niel, K.P., 2011. Improving species distribution models for climate change  
509 studies: variable selection and scale. *J. Biogeogr.* 38, 1–8.
- 510 Barro, A.S., Fegan, M., Moloney, B., Porter, K., Muller, J., Warner, S., Blackburn, J.K., 2016.  
511 Redefining the Australian anthrax belt: Modeling the ecological niche and predicting the  
512 geographic distribution of *Bacillus anthracis*. *PLoS Negl. Trop. Dis.* 10, e0004689.
- 513 Blackburn, J.K., 2006. Evaluating the spatial ecology of anthrax in North America: Examining  
514 epidemiological components across multiple geographic scales using a GIS-based  
515 approach.
- 516 Blackburn, J.K., Asher, V., Stokke, S., Hunter, D.L., Alexander, K.A., 2014a. Dances with  
517 anthrax: wolves (*Canis lupus*) kill anthrax bacteremic plains bison (*Bison bison bison*) in  
518 southwestern Montana. *J. Wildl. Dis.* 50, 393–396.
- 519 Blackburn, J.K., Goodin, D.G., 2013. Differentiation of springtime vegetation indices associated  
520 with summer anthrax epizootics in west Texas, USA, deer. *J. Wildl. Dis.* 49, 699–703.

- 521 Blackburn, J.K., McNyset, K.M., Curtis, A., Hugh-Jones, M.E., 2007. Modeling the geographic  
522 distribution of *Bacillus anthracis*, the causative agent of anthrax disease, for the  
523 contiguous United States using predictive ecologic niche modeling. *Am. J. Trop. Med.*  
524 *Hyg.* 77, 1103–1110.
- 525 Blackburn, J.K., Van Ert, M., Mullins, J.C., Hadfield, T.L., Hugh-Jones, M.E., 2014b. The  
526 necrophagous fly anthrax transmission pathway: empirical and genetic evidence from  
527 wildlife epizootics. *Vector-Borne Zoonotic Dis.* 14, 576–583.
- 528 Elith, J., Leathwick, J.R., 2009. Species distribution models: ecological explanation and  
529 prediction across space and time. *Annu. Rev. Ecol. Evol. Syst.* 40, 677.
- 530 Fielding, A.H., Bell, J.F., 1997. A review of methods for the assessment of prediction errors in  
531 conservation presence/absence models. *Environ. Conserv.* 24, 38–49.
- 532 Friedman, J.H., Meulman, J.J., 2003. Multiple additive regression trees with application in  
533 epidemiology. *Stat. Med.* 22, 1365–1381.
- 534 Grinnell, J., 1917. The niche-relationships of the California Thrasher. *The Auk* 34, 427–433.
- 535 Hanley, J.A., McNeil, B.J., 1982. The meaning and use of the area under a receiver operating  
536 characteristic (ROC) curve. *Radiology* 143, 29–36.
- 537 Hay, S.I., Tatem, A.J., Graham, A.J., Goetz, S.J., Rogers, D.J., 2006. Global environmental data  
538 for mapping infectious disease distribution. *Adv. Parasitol.* 62, 37–77.
- 539 Hijmans, R.J., Cameron, S.E., Parra, J.L., Jones, P.G., Jarvis, A., 2005. Very high resolution  
540 interpolated climate surfaces for global land areas. *Int. J. Climatol.* 25, 1965–1978.
- 541 Hugh-Jones, M., Blackburn, J., 2009. The ecology of *Bacillus anthracis*. *Mol. Aspects Med.* 30,  
542 356–367.

- 543 Hugh-Jones, M.E., De Vos, V., 2002. Anthrax and wildlife. *Rev. Sci. Tech.-Off. Int. Epizoot.* 21,  
544 359–384.
- 545 Huston, M.A., 2002. Introductory essay: critical issues for improving predictions. *Predict.*  
546 *Species Occur. Issues Accuracy Scale* 7–21.
- 547 Hutchinson, G.E., 1957. Cold spring harbor symposium on quantitative biology. Concluding  
548 Remarks 22, 415–427.
- 549 Joyner, T.A., 2010. Ecological niche modeling of a zoonosis: A case study using anthrax  
550 outbreaks and climate change in Kazakhstan.
- 551 Kracalik, I.T., Kenu, E., Ayamdooh, E.N., Allegye-Cudjoe, E., Polkuu, P.N., Frimpong, J.A.,  
552 Nyarko, K.M., Bower, W.A., Traxler, R., Blackburn, J.K., 2017. Modeling the  
553 environmental suitability of anthrax in Ghana and estimating populations at risk:  
554 Implications for vaccination and control. *PLoS Negl. Trop. Dis.* 11, e0005885.
- 555 Larson, S.R., Degroot, J.P., Bartholomay, L.C., Sugumaran, R., 2010. Ecological niche modeling  
556 of potential West Nile virus vector mosquito species in Iowa. *J. Insect Sci.* 10, 110.
- 557 Levine, R.S., Peterson, A.T., Yorita, K.L., Carroll, D., Damon, I.K., Reynolds, M.G., 2007.  
558 Ecological niche and geographic distribution of human monkeypox in Africa. *PloS One*  
559 2, e176.
- 560 Levine, R.S., Yorita, K.L., Walsh, M.C., Reynolds, M.G., 2009. A method for statistically  
561 comparing spatial distribution maps. *Int. J. Health Geogr.* 8, 7.
- 562 Lim, B., Klein, K.J., 2006. Team mental models and team performance: A field study of the  
563 effects of team mental model similarity and accuracy. *J. Organ. Behav.* 27, 403–418.
- 564 Lobo, J.M., Jiménez-Valverde, A., Real, R., 2008. AUC: a misleading measure of the  
565 performance of predictive distribution models. *Glob. Ecol. Biogeogr.* 17, 145–151.

- 566 Martinez-Meyer, E., Peterson, A.T., Servín, J.I., Kiff, L.F., 2006. Ecological niche modelling  
567 and prioritizing areas for species reintroductions. *Oryx* 40, 411–418.
- 568 McNyset, K.M., Blackburn, J.K., 2006. Does GARP really fail miserably? A response to. *Divers.*  
569 *Distrib.* 12, 782–786.
- 570 Morris, L.R., Proffitt, K.M., Asher, V., Blackburn, J.K., 2016. Elk resource selection and  
571 implications for anthrax management in Montana. *J. Wildl. Manag.* 80, 235–244.
- 572 Mullins, J., Lukhnova, L., Aikimbayev, A., Pazilov, Y., Van Ert, M., Blackburn, J.K., 2011.  
573 Ecological Niche Modelling of the *Bacillus anthracis* A1. a sub-lineage in Kazakhstan.  
574 *BMC Ecol.* 11, 32.
- 575 Mullins, J.C., Garofolo, G., Van Ert, M., Fasanella, A., Lukhnova, L., Hugh-Jones, M.E.,  
576 Blackburn, J.K., 2013. Ecological niche modeling of *Bacillus anthracis* on three  
577 continents: evidence for genetic-ecological divergence? *PloS One* 8, e72451.
- 578 Openshaw, S., Taylor, P., 1979. A million or so correlation coefficients: three experiments on the  
579 modifiable areal unit problem. 127-144. *Stat. Appl. Spat. Sci.* Pion Lond.
- 580 Ostfeld, R.S., Glass, G.E., Keesing, F., 2005. Spatial epidemiology: an emerging (or re-  
581 emerging) discipline. *Trends Ecol. Evol.* 20, 328–336.
- 582 Pearson, R.G., Dawson, T.P., 2003. Predicting the impacts of climate change on the distribution  
583 of species: are bioclimate envelope models useful? *Glob. Ecol. Biogeogr.* 12, 361–371.
- 584 Peterson, A., Cohoon, K., 1999. Sensitivity of distribution prediction algorithms to geographic  
585 completeness. *Ecol. Model.* 117, 159–164.
- 586 Peterson, A.T., Papeş, M., Eaton, M., 2007. Transferability and model evaluation in ecological  
587 niche modeling: a comparison of GARP and Maxent. *Ecography* 30, 550–560.



- 588 Peterson, A.T., Vieglais, D.A., 2001. Predicting Species Invasions Using Ecological Niche  
589 Modeling: New Approaches from Bioinformatics Attack a Pressing Problem: A new  
590 approach to ecological niche modeling, based on new tools drawn from biodiversity  
591 informatics, is applied to the challenge of predicting potential species' invasions.  
592 *BioScience* 51, 363–371.
- 593 Pulliam, H.R., 1988. Sources, sinks, and population regulation. *Am. Nat.* 132, 652–661.
- 594 Sloyer, K., Burkett-Cadena, N.D., Yang, A., Corn, J.L., Vigil, S.L., McGregor, B.L., Wisely,  
595 S.M., Blackburn, J.K., 2018. Ecological niche modeling the potential geographic  
596 distribution of four *Culicoides* species of veterinary significance in Florida. *bioRxiv*  
597 447003.
- 598 Stein, C.D., 1945. The history and distribution of anthrax in livestock in the United States. *Vet*  
599 *Med* 40, 340–349.
- 600 Stockwell, D., 1999. The GARP modelling system: problems and solutions to automated spatial  
601 prediction. *Int. J. Geogr. Inf. Sci.* 13, 143–158.
- 602 Sweeney, A., Beebe, N., Cooper, R., 2007. Analysis of environmental factors influencing the  
603 range of anopheline mosquitoes in northern Australia using a genetic algorithm and data  
604 mining methods. *Ecol. Model.* 203, 375–386.
- 605 Thomasson, V., Blouin-Demers, G., 2015. Using habitat suitability models considering biotic  
606 interactions to inform critical habitat delineation: An example with the eastern hog-nosed  
607 snake (*Heterodon platirhinos*) in Ontario, Canada. *Can Wildl. Biol Manag* 4, 1–17.
- 608 Van Ness, G., 1959. Anthrax—a soil borne disease. *Soil Conserv* 21, 206–208.
- 609 Van Ness, G.B., 1971. Ecology of anthrax. *Science* 172, 1303–1307.

610 Vega, G., Pertierra, L., Olalla-Tárraga, M., 2016. Data from: MERRAclim, a high-resolution  
611 global dataset of remotely sensed bioclimatic variables for ecological modelling. Dryad  
612 Digit. Repos.  
613 Vega, G.C., Pertierra, L.R., Olalla-Tárraga, M.Á., 2017. MERRAclim, a high-resolution global  
614 dataset of remotely sensed bioclimatic variables for ecological modelling. Sci. Data 4,  
615 170078.  
616

617 **Appendices**

618 **Appendix A.** Figure for the simulated environmental layers

619 **Fig. A. 1.** Simulated environmental layers with an extent of 10.5 \* 10.5 degree and 0.01 \* 0.01

620 degree resolution; the origins of both x and y coordinates start from 1.

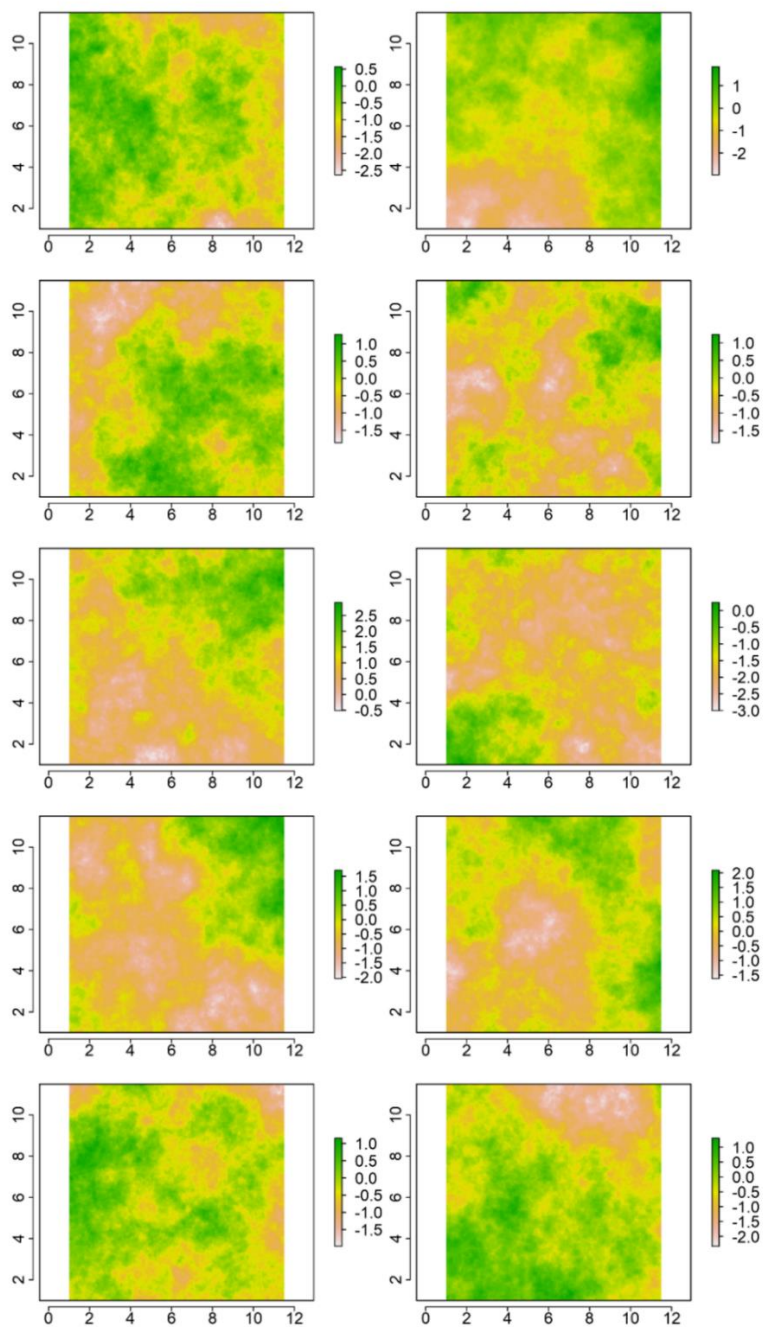

621

622 **Appendix B.** Derivation of the probabilities  $r = 0, 1, 2, 3$  based on a random draw.

623 For  $r = 0$ , the probability is given by the joint probability of obtaining an incorrect variable in  
624 each of the three draws. In the first draw, there are 7 out of 10 variables that were not used to  
625 generate the species distribution thus, the probability of choosing an incorrect variable in the first  
626 draw is  $7/10$ . Then, in the second draw, there are only 9 variables left to choose from and only 6  
627 of them are incorrect such that the probability of obtaining an incorrect variable in the second  
628 draw is  $6/9$ . Using the same rationale, the probability of choosing an incorrect variable in the  
629 third draw is  $5/8$ . Thus, the probability of picking 3 incorrect variables out of 10 possible ones  
630 without replacement is just the multiplication of  $7/10$ ,  $6/9$  and  $5/8$ . Thus  $P(r = 0) = (7/10) * (6/9) * (5/8) \approx 0.3$ . Now, for  $r = 3$ , using the same rationale as for  $r = 1$ , for the first draw  
632 there are three correct variables out of ten, in the second draw five that we chose a correct  
633 variable in the first draw there are only two out of nine left and in the third draw, given that we  
634 chose correctly the variables in the first and second draws there is only one correct variable out  
635 of eight to choose from. Thus  $P(r = 3) = (3/10) * (2/9) * (1/8) \approx 0.008$ . For the cases in  $r$   
636  $= 1$  and  $r = 2$  we need to take into account the order in which we can draw one or two correct  
637 variables. For example, for  $r = 1$ , we can choose the correct variable in the first, second or third  
638 draw. This means that we have three ways of choosing one variable out of ten. It is, that in the  
639 first draw we choose the correct variable and in the other two are incorrect or that we choose an  
640 incorrect variable in the first draw, the correct one in the second and an incorrect one in the third  
641 again or that we choose two incorrect variables in the first two draws and a correct one in the  
642 third draw. Let C be the draw of a correct variable and I be the draw of an incorrect variable.  
643 Thus, the chances of getting exactly one correct variable out of ten in three draws is represented  
644 by, CII, ICI, IIC. This is,  $P(r = 1) = (3/10) * (6/9) * (5/8) + (7/10) * (3/9) * (6/8) +$

645  $(7/10) * (6/9) * (3/8) = 0.525$ . Similarly, for  $r = 2$ , we have that the ways of picking two  
646 correct variables out of ten are, CCI, CIC, ICC.  $P(r = 2) = (3/10) * (2/9) * (7/8) + (3/10) * (7/9) * (2/8) + (7/10) * (3/9) * (2/8) = 0.175$ . Since the random variable  $R$  can only take  
647 values of 0, 1, 2, 3, the sum of the probabilities must add up to one.  $P(R = r) = P(r = 0) +$   
648  $P(r = 1) + P(r = 2) + P(r = 3) = 0.291 + 0.525 + 0.175 + 0.008 \approx 1$ . Because of the  
649 precision with which we are defining the probabilities, the latter does not add up to one but  
650 taking into account all decimal places it does.  
651  
652
